# Supplementary material
Source: Springer Nature journal article supplement (https://www.springermedizin.de/resource/supplementary/12885_2008_1400_MOESM3_ESM.pdf/9473032)

## Post therapy radioactivity pharmacokinetics

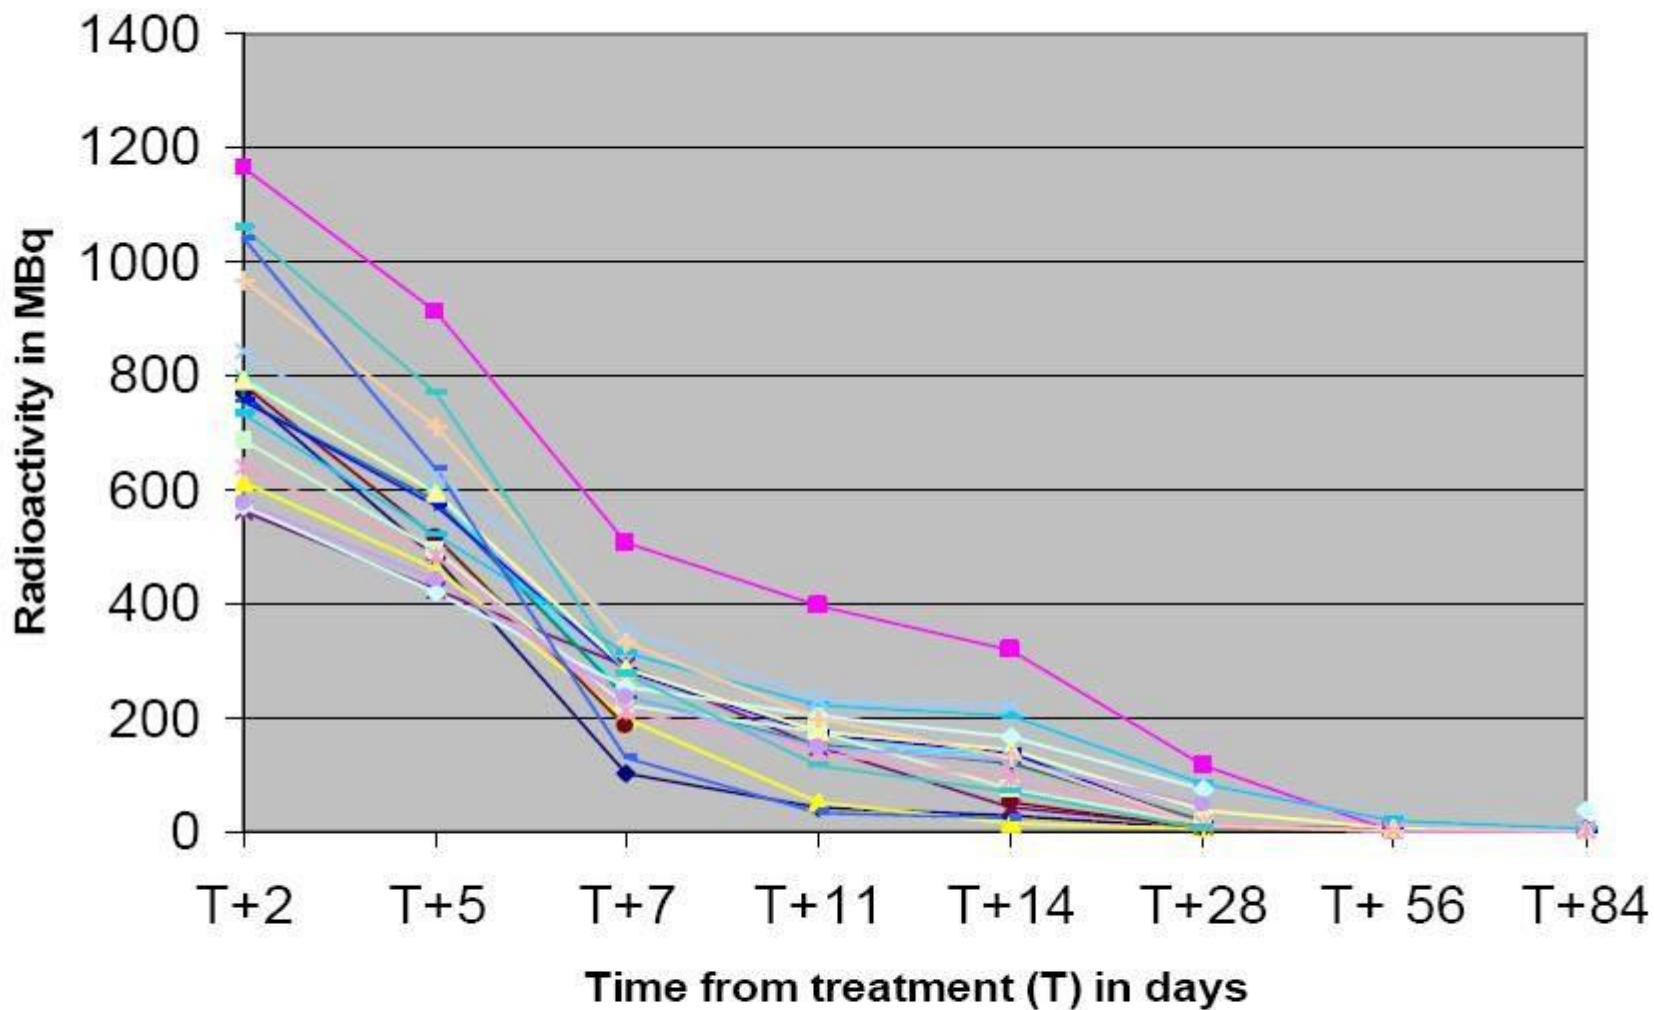

Key: MBq= megabecquerel

Supplement: MOESM3 [file 9473032]
